# Supplementary material for: DFT modeling of the relative affinity of nitrogen ligands for trivalent f elements: an energetic point of view
Source: Royal Society of Chemistry journal article supplement (doi:10.1039/b706332f), 2007-01-01
Supplement: b706332f.pdf [file b706332f.pdf]

# DFT modeling of the relative affinity of nitrogen ligands for trivalent f elements: an energetic point of view

Laurence Petit, Claude Daul, Carlo Adamo and Pascale Maldivi

## SUPPLEMENTARY INFORMATION

**Supplementary information 1.** Detailed results for  $[\text{La}(\text{MeBTP})_3]^{3+}$  in a vacuum and in pyridine solvent (COSMO). Experimental values<sup>23</sup> are mentioned in parentheses.

|                                            | $[\text{La}(\text{MeBTP})_3]^{3+}$ , vacuum                 | $[\text{La}(\text{MeBTP})_3]^{3+}$ , pyridine Cosmo         |
|--------------------------------------------|-------------------------------------------------------------|-------------------------------------------------------------|
| <i>Optimized geometries</i>                |                                                             |                                                             |
| d(M-N <sub>c</sub> ), Å                    | 2.68 (2.67)                                                 | 2.68 (2.67)                                                 |
| d(M-N <sub>i</sub> ), Å                    | 2.66 (2.63)                                                 | 2.66 (2.63)                                                 |
| <i>Mulliken charges</i>                    |                                                             |                                                             |
| q(M),  e <sup>-</sup>                      | 2.00                                                        | 1.98                                                        |
| q(MeBTP),  e <sup>-</sup>                  | 0.33                                                        | 0.34                                                        |
| <i>Energetic analysis</i>                  |                                                             |                                                             |
| $\Delta E_{\text{Pauli}}$ , eV             | 8.74                                                        | 8.90                                                        |
| $\Delta E_{\text{elec}}$ , eV              | -17.84                                                      | -19.70                                                      |
| $\Delta E_{\text{steric}}$ , eV            | -9.11                                                       | -10.79                                                      |
| $\Delta E_{\text{orb}}$ , eV               | -20.54                                                      | -18.98                                                      |
| $\Delta E_{\text{solv}}(\text{el})^*$ , eV | -                                                           | 16.76                                                       |
| $\Delta E_{\text{solv}}(\text{cd})^*$ , eV | -                                                           | 0.18                                                        |
| $\Delta E_{\text{tot}}$ , eV               | -29.64                                                      | -12.84                                                      |
| <i>Orbital analysis</i>                    |                                                             |                                                             |
|                                            | <b>No backdonation</b>                                      | <b>No backdonation</b>                                      |
|                                            | <b>Donation</b><br>0.18  e <sup>-</sup>   on d(La) orbitals | <b>Donation</b><br>0.18  e <sup>-</sup>   on d(La) orbitals |

\* el : electrostatic term in the solvation energy – cd : cavitation and dispersion terms in the solvation energy

**Supplementary information 2.** Energetic decomposition of the different contributions involved in the complexation process of  $M^{3+}$  by 3 ligands. Details relative to cerium complexes in the optimized geometry of uranium systems and of uranium complexes in the optimized geometry of cerium systems is also given. For comparison, the evolution of back-bonding effects is shown.

|                                            | M=Ce   | M=U    | M=Ce in U<br>geometry | M=U in Ce<br>geometry |
|--------------------------------------------|--------|--------|-----------------------|-----------------------|
| <i>[M(Terpy)<sub>3</sub>]<sup>3+</sup></i> |        |        |                       |                       |
| $\Delta E_{\text{Pauli}}$ , eV             | 48.61  | 63.46  | 57.21                 | 53.63                 |
| $\Delta E_{\text{elec}}$ , eV              | -20.37 | -23.76 | -23.48                | -20.36                |
| $\Delta E_{\text{steric}}$ , eV            | 28.24  | 39.70  | 33.72                 | 33.27                 |
| $\Delta E_{\text{orb}}$ , eV               | -57.56 | -70.31 | -63.33                | -63.22                |
| $\Delta E_{\text{bonding}}$ , eV           | -29.32 | -30.62 | -29.60                | -29.94                |
| Back-bonding,  e <sup>-</sup>              | 0.08   | 0.48   | 0.16                  | 0.30                  |
| <i>[M(MeBTP)<sub>3</sub>]<sup>3+</sup></i> |        |        |                       |                       |
| $\Delta E_{\text{Pauli}}$ , eV             | 52.24  | 68.79  | 61.79                 | 57.84                 |
| $\Delta E_{\text{elec}}$ , eV              | -21.64 | -25.50 | -25.03                | -21.77                |
| $\Delta E_{\text{steric}}$ , eV            | 30.60  | 43.29  | 36.76                 | 36.08                 |
| $\Delta E_{\text{orb}}$ , eV               | -61.52 | -75.23 | -67.45                | -67.88                |
| $\Delta E_{\text{bonding}}$ , eV           | -30.91 | -31.94 | -30.69                | -31.80                |
| Back-bonding,  e <sup>-</sup>              | 0.16   | 0.59   | 0.25                  | 0.47                  |
| <i>[M(HBTP)<sub>3</sub>]<sup>3+</sup></i>  |        |        |                       |                       |
| $\Delta E_{\text{Pauli}}$ , eV             | 51.35  | 67.30  |                       |                       |
| $\Delta E_{\text{elec}}$ , eV              | -21.29 | -24.95 |                       |                       |
| $\Delta E_{\text{steric}}$ , eV            | 30.06  | 42.35  |                       |                       |
| $\Delta E_{\text{orb}}$ , eV               | -58.86 | -72.27 |                       |                       |
| $\Delta E_{\text{bonding}}$ , eV           | -28.79 | -29.92 |                       |                       |

**Supplementary information 3.** Percentage contributions of the electrostatic and orbital terms to the metal-ligand bond.

|       | $[\text{Ce}(\text{terpy})_3]^{3+}$ | $[\text{U}(\text{terpy})_3]^{3+}$ | $[\text{Ce}(\text{MeBTP})_3]^{3+}$ | $[\text{U}(\text{MeBTP})_3]^{3+}$ | $[\text{Ce}(\text{HBTP})_3]^{3+}$ | $[\text{U}(\text{HBTP})_3]^{3+}$ |
|-------|------------------------------------|-----------------------------------|------------------------------------|-----------------------------------|-----------------------------------|----------------------------------|
| %elec | 26.1                               | 25.3                              | 26.0                               | 25.3                              | 26.6                              | 25.7                             |
| %orb  | 73.9                               | 74.7                              | 74.0                               | 74.7                              | 73.4                              | 74.3                             |
